# Supplementary material for: A Novel Approach to Assess the Potency of Topical Corticosteroids
Source: MDPI journal article supplement (doi:10.3390/pharmaceutics13091456), 2021-09-13
Supplement: s1 [file s1]

Archive with 1 entries (1 files):
- pharmaceutics-1305319-supplementary.pdf
