# Supplementary material for: A Novel Approach to Assess the Potency of Topical Corticosteroids
Source: MDPI journal article supplement (doi:10.3390/pharmaceutics13091456), 2021-09-13
Supplement: s1 [file s1 › pharmaceutics-1305319-supplementary.pdf]

# Supplementary Materials: A Novel Approach to Assess the Potency of Topical Corticosteroids

Michael Zvidzayi, Seeprarani Rath, Charles Bon, Sagar Abboo and Isadore Kanfer

**Table S1.** Types of discrepancies observed in potency ranking of topical corticosteroids.

| Types of discrepancies                         | Description                                                                                                                                                                                                                                                                                                                                                                                                                                                                                                                                                                                                                                                                                                                                                   |
|------------------------------------------------|---------------------------------------------------------------------------------------------------------------------------------------------------------------------------------------------------------------------------------------------------------------------------------------------------------------------------------------------------------------------------------------------------------------------------------------------------------------------------------------------------------------------------------------------------------------------------------------------------------------------------------------------------------------------------------------------------------------------------------------------------------------|
| Generic and innovator products                 | Some generic formulations have been shown to be less or more potent than their brand-name equivalent indicating a discrepancy between clinical assessment and VCA [1]. However, the data generated did not comply with the requirements of the VCA guidance since only a simple single point assessment was used.                                                                                                                                                                                                                                                                                                                                                                                                                                             |
| Same product under different potency classes   | 0.1% mometasone furoate (Elocon®)<br>UK - potent (method of assessment not provided) [2]<br>USA - ointment: class II (potent), cream: class IV (midstrength) [3]<br>The Monthly Prescribing Reference (MPR) - cream, ointment and lotion: intermediate potency [4]                                                                                                                                                                                                                                                                                                                                                                                                                                                                                            |
| Incomplete API and product information         | UK - None of the items indicate the type of formulation and most do not state the percentage API incorporated in the dosage form [2]<br>New Zealand - Apart from betamethasone dipropionate products, no mention is made of the formulation or corticosteroid concentration [5]                                                                                                                                                                                                                                                                                                                                                                                                                                                                               |
| Classification criteria in different countries | The number of classes and order of potency vary between the classification systems used in different countries<br><br>USA - Seven classes (descending order of potency) [3]<br>Class I: superpotent to Class VII: least potent<br><br>Australia - Four classes (ascending order of potency) [6]<br>Class I: mild to Class IV: very potent<br><br>Europe - Four classes (ascending order of potency) [7]<br>Class I: mildly potent to Class IV: very potent<br><br>New Zealand - Four classes (descending order of potency) [5]<br>Class I: very potent/ superpotent to Class IV: mild (potency classification based on a comparison with hydrocortisone)<br><br>UK - Four classes (descending order of potency) [2]<br>Class I: very potent to Class IV: mild |
| Classification based on skin pathology         | Eumovate® (0.05% clobetasone 17-butyrate) vs Locoid® (0.1% hydrocortisone 17-butyrate) ointments in eczema and psoriasis patients [8]<br>Eczema: Eumovate® = Locoid®<br>Psoriasis: Eumovate® > Locoid®                                                                                                                                                                                                                                                                                                                                                                                                                                                                                                                                                        |
| Concentration and potency                      | Potency is not always concentration dependent [9]. In some cases, different concentrations are equipotent but not in others, viz.:<br>Kenalog® creams: 0.025% = 0.1% = 0.5%<br>Aristocort® creams: 0.025% = 0.1% = 0.5%<br>Aristocort® ointments: 0.1% = 0.5%<br>Aristocort A® creams: 0.025% = 0.5% < 0.1%<br>Hytone® creams: 1.0% = 2.5%<br>Synalar® creams: 0.2% > 0.025% > 0.01%<br>Topicort® creams: 0.25% = 0.05%<br>Valisone® creams: 0.1% > 0.01%                                                                                                                                                                                                                                                                                                     |

|                                               |                                                                                                                                                                                                                                                                           |
|-----------------------------------------------|---------------------------------------------------------------------------------------------------------------------------------------------------------------------------------------------------------------------------------------------------------------------------|
| Correlation of clinical studies with VCA data | 20 out of 23 comparisons - VCA data in agreement with clinical study [10] although non-validated VCA used.<br>Author stated "it would clearly be advantageous to develop a system for evaluating the potency of these compounds without having to rely on clinical tests" |
|-----------------------------------------------|---------------------------------------------------------------------------------------------------------------------------------------------------------------------------------------------------------------------------------------------------------------------------|

**Table S2.** Application template showing details of the halcinonide and clobetasol propionate (1) responses obtained at various dose durations in Figure 1.

| Right Arm. |                   |        |                   | Left Arm |                   |        |                   |
|------------|-------------------|--------|-------------------|----------|-------------------|--------|-------------------|
| Site #     | API-Dose duration | Site # | API-Dose duration | Site #   | API-Dose duration | Site # | API-Dose duration |
| 1          | H-150             | 9      | CP-60             | 17       | CP-90             | 25     | H-40              |
| 2          | CP-40             | 10     | UT                | 18       | UT                | 26     | CP-20             |
| 3          | H-60              | 11     | H-10              | 19       | H-5               | 27     | H-10              |
| 4          | UT                | 12     | H-90              | 20       | CP-40             | 28     | UT                |
| 5          | CP-90             | 13     | CP-20             | 21       | H-20              | 29     | CP-150            |
| 6          | H-20              | 14     | H-40              | 22       | CP-10             | 30     | H-90              |
| 7          | CP-10             | 15     | CP-5              | 23       | H-60              | 31     | CP-60             |
| 8          | H-5               | 16     | CP-150            | 24       | H-150             | 32     | CP-5              |

H – halcinonide, CP – clobetasol propionate (1), UT – untreated site and 5, 10, 20, 40, 60, 90, 150 – corresponding dose durations in minutes.

## References

- Olsen, E.A. A double-blind controlled comparison of generic and trade-name topical steroids using the vasoconstriction assay. *Arch. Dermatol.* **1991**, *127*, 197–201.
- Topical corticosteroids. In *British National Formulary*; British Medical Association and Royal Pharmaceutical Society of Great Britain: London, 2019; pp. 1241–1242.
- Hengge, U.R.; Ruzicka, T.; Schwartz, R.A.; Cork, M.J. Adverse effects of topical glucocorticosteroids. *J. Am. Acad. Dermatol.* **2006**, *54*, 1–15, doi:10.1016/j.jaad.2005.01.010.
- Topical Steroid Potencies Available online: <https://www.empr.com/home/clinical-charts/topical-steroid-potencies/> (accessed on Aug 3, 2021).
- Topical steroid. Available online: <https://dermnetnz.org/topics/topical-steroid/> (accessed on Mar 26, 2021).
- Mooney, E.; Rademaker, M.; Dailey, R.; Daniel, B.S.; Drummond, C.; Fischer, G.; Foster, R.; Grills, C.; Halbert, A.; Hill, S.; et al. Adverse effects of topical corticosteroids in paediatric eczema: Australasian consensus statement. *Australas. J. Dermatol.* **2015**, *56*, 241–251, doi:https://doi.org/10.1111/ajd.12313.
- Green, C.; Colquitt, J.; Kirby, J.; Davidson, P.; Payne, E. Clinical and cost-effectiveness of once-daily versus more frequent use of same potency topical corticosteroids for atopic eczema: a systematic review and economic evaluation. *Health Technol. Assess. (Rockv)*. **2004**, *8*, iii,iv, 1-120, doi:10.3310/hta8470.
- Allenby, C.F.; Sparkes, C.G. Halogenation and topical corticosteroids: a comparison between the 17-butyrate esters of hydrocortisone and clobetasone in ointment bases. *Br. J. Dermatol.* **1981**, *104*, 179–183, doi:10.1111/j.1365-2133.1981.tb00042.x.
- Stoughton, R.B.; Wullich, K. The Same Glucocorticoid in Brand-Name Products: Does Increasing the Concentration Result in Greater Topical Biologic Activity? *Arch. Dermatol.* **1989**, *125*, 1509–1511, doi:10.1001/archderm.1989.01670230051007.
- Cornell, R.C. Clinical trials of topical corticosteroids in psoriasis: correlations with the vasoconstrictor assay. *Int. J. Dermatol.* **1992**, *31 Suppl 1*, 38–40, doi:10.1111/j.1365-4362.1992.tb04012.x.
